# Supplementary material
Source: PubMed Central journal article supplement (PMC2752012)
Supplement: jlb.0209059_1.pdf [file jlb.0209059_1.pdf]

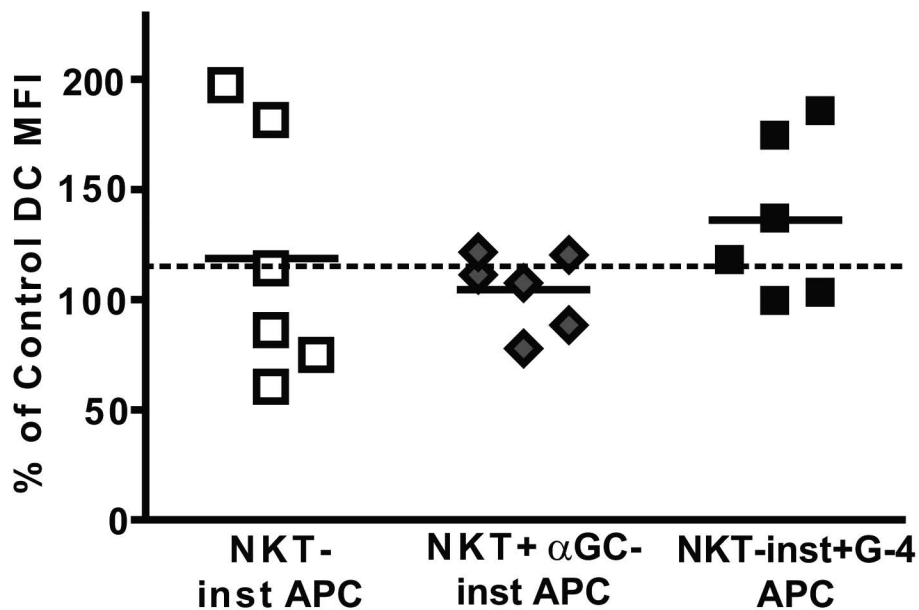

**Supplemental Figure 1. Flow cytometric analysis of MHC class II expression levels on NKT-instructed APCs.** Cell surface expression levels of MHC class II molecules were determined by flow cytometric analysis and the levels on NKT-instructed APCs are shown as a percentage of those on control DCs. Each symbol represents data from one independent experiment.

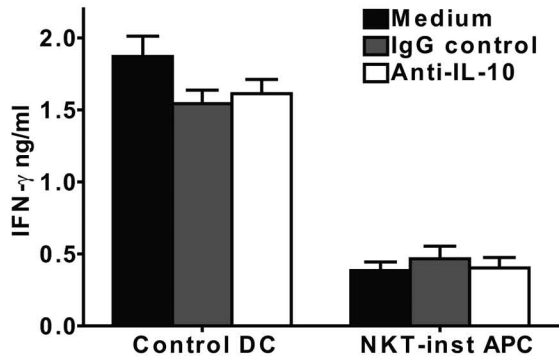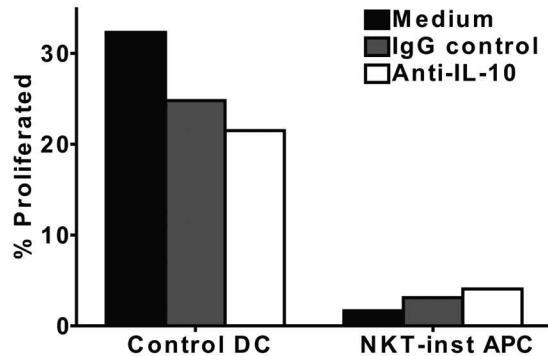

**Supplemental Figure 2. Role of IL-10 in suppressive effects of NKT-instructed APCs on T cells.** **A)** Control DCs or NKT-instructed APCs were incubated with allogeneic peripheral blood T cells in the presence of an anti-IL-10 blocking mAb ("Anti-IL-10"), or of an isotype-matched negative control mAb ("IgG control"), or with no added antibody ("Medium"). Supernatants were withdrawn after 24 hours and analyzed in triplicate for IFN $\gamma$  using a standardized ELISA. **B)** Allogeneic peripheral blood T cells were labeled with CFSE and cultured with the indicated APCs for 7 days in the presence or absence of anti-IL-10 blocking or isotype-matched negative control mAbs. The plot shows the percentage of the live T cell population that underwent cell division, as assessed by reduction of CFSE fluorescence.

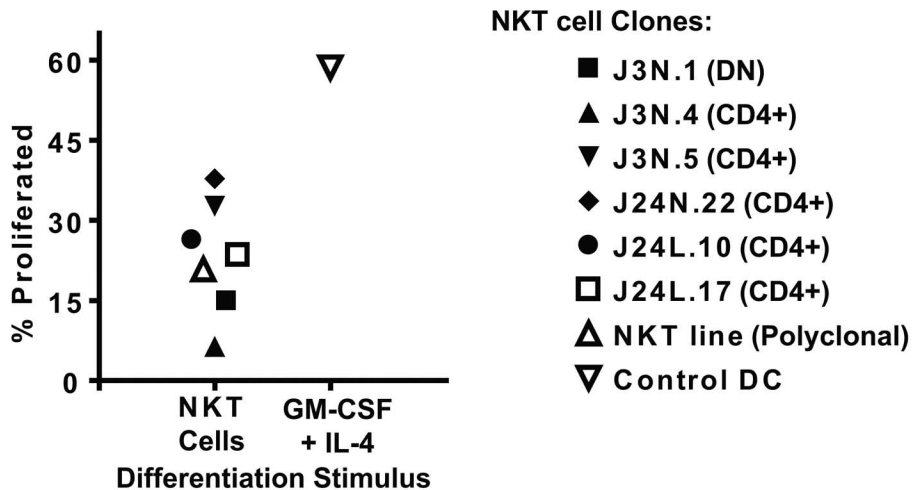

**Supplemental Figure 3. Similar effects of different NKT cell clones.** Purified peripheral blood monocytes were cultured with recombinant GM-CSF and IL-4 (open inverted triangle), or exposed to trans-well inserts containing the indicated NKT cells with  $\alpha$ -GalCer pulsed monocytes. After 3 days of differentiation, the APCs were washed and then matured by exposure to LPS for an additional 48 hours. Allogeneic peripheral blood T cells were labeled with CFSE and cultured with the APCs for 7 days. The symbols show the percentage of the live T cell population that underwent cell division (as assessed by reduction of CFSE fluorescence) in each culture. Similar results were also observed in an independent experiment using monocytes purified from a different allogeneic donor.
